# Supplementary material for: Agroforestry species composition and growth of Black Cardamom in different habitats along altitudinal gradient, Bhutan
Source: Research Square preprint supplement (doi:10.21203/rs.3.rs-2302980/v1), 2022-11-29
Supplement: Supplementary file 1 [file 31212cb3af4da2f303675900.docx]

**Supplementary material 1**

Table A.1 Presence of Agroforestry tree species with Black Cardamom in different habitats

|  |  |  |  | **Habitats** |  |
| --- | --- | --- | --- | --- | --- |
| **SL. No** | **Agroforestry tree species** | **Family** | **TT** | **MT** | **FT** |
| 1 | *Acacia catechu* L.f. | Fabaceae | - | + | - |
| 2 | *Alangium chinense* Lour. | Cornaceae | - | - | + |
| 3 | *Albizia lebbeck* Benth. | Fabaceae | + | + | + |
| 4 | *Albizia procera* Benth. | Fabaceae | + | + | + |
| 5 | *Alnus nepalensis* D.Don. | Betulaceae | + | + | + |
| 6 | *Antidesma acuminatum* Wight. | Myrsinaceae | + | + | - |
| 7 | *Artocarpus heterophyllus* Lamarck. | Moraceae | - | + | + |
| 8 | *Bauhinia purpurea* L. | Fabaceae | + | + | + |
| 9 | *Bombax ceiba* L. | Bombacaceae | + | - | + |
| 10 | *Brassaiopsis glomerulata* Blume. | Araliaceae | - | + | + |
| 11 | *Calicarpa arborea* Roxb. | Lamiaceae | - | + | + |
| 12 | *Carica papaya* L. | Caricaceae | - | + | - |
| 13 | *Celtis trtrandra* Roxb. | Ulmaceae | + | - | + |
| 14 | *Choerospondias axillaris* Roxb. | Anacardiaceae | + | - | - |
| 15 | *Citrus reticulata* Blanco. | Rutaceae | - | + | + |
| 16 | *Citrus sinensis* Osbeck. | Rutaceae | - | + | - |
| 17 | *Corylus avellane* L. | Betulaceae | + | + | - |
| 18 | *Cryptomeria japonica* (L.f.) D. Don. | Taxodiaceae | + | + | - |
| 19 | *Docynia indica* Wallich. | Rosaceae | - | + | - |
| 20 | *Endospermum chinensis* Benth. | Euphorbiaceae | + | - | - |
| 21 | *Engelhardia spicata* Lesch. | Juglandaceae | + | + | - |
| 22 | *Erythrina arborescens* Roxb. | Fabaceae | + | + | - |
| 23 | *Eurya acuminata* DC. | Theaceae | + | - | - |
| 24 | *Exbucklandia populnea* R.W.Br. | Hamamelidaceae | + | - | + |
| 25 | *Ficus auriculata* Loureiro. | Moraceae | + | + | + |
| 26 | *Ficus benghalensis* L. | Moraceae | - | - | + |
| 27 | *Ficus benjamina* L. | Moraceae | - | + | + |
| 28 | *Ficus concinna* Miquel. | Moraceae | - | + | + |
| 29 | *Ficus neriifolia* J.E. Smith. | Moraceae | - | + | + |
| 30 | *Ficus semicordata* J.E. Smith. | Moraceae | + | + | + |
| 31 | *Glochidion acuminatum* Mull. Arg. | Euphorbiaceae | + | - | - |
| 32 | *Grevillea robusta* A.Cunn. | Proteaceae | - | + | - |
| 33 | *Grewia vestita* Wall. | Malvaceae | - | - | + |
| 34 | *Litsea Kingii* Hook.f. | Lauraceae | + | + | + |
| 35 | *Litsea monopetala* Roxb. | Lauraceae | - | + | + |
| 36 | *Macaranga denticulata* Blume. | Euphorbiaceae | + | + | + |
| 37 | *Mangifera indica* L. | Anacardiaceae | - | + | + |
| 38 | *Melia azedarach* L. | Meliaceae | - | - | + |
| 39 | *Michelia champaca* Baill. | Magnoliaceae | + | - | + |
| 40 | *Persea americana* Mill. | Lauraceae | - | + | - |
| 41 | *Phyllanthus emblica* L. | Phyllanthaceae | + | - | - |
| 42 | *Prunus cerasoides* D.Don. | Rosaceae | + | - | + |
| 43 | *Prunus domestica* L. | Rosaceae | - | + | - |
| 44 | *Prunus persica* Batsch. | Rosaceae | - | + | - |
| 45 | *Psidium guajava* L. | Myrtaceae | - | + | + |
| 46 | *Punica granatum* L. | Lythraceae | - | + | - |
| 47 | *Pyrus communis* L. | Rosaceae | - | + | - |
| 48 | *Quercus semecarpifolia* Smith. | Fagaceae | - | - | + |
| 49 | *Salix babylonica* L. | Salicaceae | - | + | + |
| 50 | *Saurauria napaulensis* DC. | Actinidaceae | - | + | + |
| 51 | *Schima wallichii* (DC.) Korth. | Theaceae | + | + | + |
| 52 | *Solanum betaceum* Cave. | Solanaceae | - | + | - |
| 53 | *Syzygium formosum* Wall. | Myrtaceae | - | - | + |
| 54 | *Tectona grandis* L.f. | Lamiaceae | + | - | - |
| 55 | *Trema politoria* Planchon. | Ulmaceae | + | + | - |
| 56 | *Zizyphus mauritiana* Lam. | Rhamnaceae | - | - | + |

**Supplementary material 2** Mean comparison of different agroforestry species live forms

| Life forms | Mean (M) | SD | *F* | *P*-value |
| --- | --- | --- | --- | --- |
| Timber trees | 53.75 | 14.99 | 45.672 | .000 |
| Fodder trees | 37.61 | 12.26 |  |  |
| Edible fruit trees | 8.64 | 6.04 |  |  |

SD: Standard Deviation

**Supplementary material 3** IVI (%) indicating importance of tree species for Black Cardamom

|  | **Low altitude** | |  | **Mid altitude** | |  | **High altitude** | |  |
| --- | --- | --- | --- | --- | --- | --- | --- | --- | --- |
| **Agroforestry tree species** | **TT** | **MT** | **FT** | **TT** | **MT** | **FT** | **TT** | **MT** | **FT** |
| *Acacia catechu* |  | 6.30 |  |  |  |  |  |  |  |
| *Alangium chinense* |  |  |  |  |  | 2.95 |  |  |  |
| *Albizia lebbeck* | 41.02 | 2.81 |  | 36.75 | 6.64 |  | 12.32 |  | 16.68 |
| *Albizia procera* | 22.20 | 9.40 |  | 9.03 | 9.60 | 8.44 |  |  |  |
| *Alnus nepalensis* | 89.8 | 19.87 |  | 98.94 | 28.97 | 7.77 | 141.33 | 46.21 | 3.80 |
| *Antidesma acuminatum* |  | 1.69 |  |  |  |  | 9.65 |  |  |
| *Artocarpus heterophyllus* |  | 2.74 | 5.12 |  |  |  |  |  |  |
| *Bauhinia purpurea* |  | 1.85 | 31.12 |  | 2.36 |  | 3.95 | 4.00 |  |
| *Bombax ceiba* |  |  |  | 14.91 |  | 5.52 |  |  |  |
| *Brassaiopsis glomerulata* |  |  |  |  | 2.74 | 6.31 |  |  | 7.59 |
| *Calicarpa arborea* |  |  |  |  | 6.05 | 3.00 |  | 2.63 | 11.65 |
| *Carica papaya* |  | 1.71 |  |  |  |  |  |  |  |
| *Celtis trtrandra* | 8.81 |  |  |  |  | 2.91 |  |  |  |
| *Choerospondias axillaris* |  |  |  |  |  |  | 13.98 |  |  |
| *Citrus reticulata* |  | 61.92 | 16.42 |  | 67.30 |  |  | 12.08 |  |
| *Citrus sinensis* |  | 1.75 |  |  |  |  |  | 2.35 |  |
| *Corylus avellane* | 10.50 |  |  | 3.66 |  |  | 3.20 | 9.51 |  |
| *Cryptomeria japonica* |  | 1.75 |  | 8.84 |  |  | 3.95 |  |  |
| *Docynia indica* |  |  |  |  |  |  |  | 14.67 |  |
| *Endospermum chinensis* |  |  |  |  |  |  | 3.20 |  |  |
| *Engelhardia spicata* |  |  |  |  | 3.94 |  | 15.88 |  |  |
| *Erythrina arborescens* | 8.69 |  |  |  |  |  | 3.06 | 3.06 |  |
| *Eurya acuminata* |  |  |  | 3.84 |  |  | 4.02 |  |  |
| *Exbucklandia populnea* |  |  |  | 5.17 |  | 8.39 |  |  |  |
| *Ficus auriculata* |  | 15.31 | 56.82 |  | 23.84 | 44.14 |  | 46.38 | 118.09 |
| *Ficus benghalensis* |  |  | 16.77 |  |  | 4.01 |  |  |  |
| *Ficus benjamina* |  |  |  |  | 1.95 | 18.30 |  | 6.62 | 5.51 |
| *Ficus concinna* |  | 6.33 |  |  | 2.70 | 61.69 |  |  |  |
| *Ficus neriifolia* |  |  | 18.31 |  | 7.79 | 17.12 |  | 9.44 | 37.22 |
| *Ficus semicordata* |  | 28.57 | 71.01 |  | 24.69 | 36.07 |  | 36.98 | 43.17 |
| *Glochidion acuminatum* |  |  |  |  |  |  | 3.06 |  |  |
| *Grevillea robusta* |  | 2.32 |  |  |  |  |  |  |  |
| *Grewia vestita* |  |  | 2.93 |  |  |  |  |  |  |
| *Litsea Kingii* | 3.27 |  | 11.92 |  | 9.97 | 11.95 | 13.98 |  |  |
| *Litsea monopetala* |  | 7.99 |  |  |  | 6.46 |  |  | 4.98 |
| *Macaranga denticulata* |  | 9.75 | 17.05 | 14.34 | 21.05 | 25.63 | 12.66 | 12.25 | 23.90 |
| *Mangifera indica* |  | 17.88 | 6.02 |  |  |  |  | 5.08 |  |
| *Melia azedarach* |  |  |  |  |  | 3.21 |  |  |  |
| *Michelia champaca* |  |  |  | 12.00 |  | 2.83 | 10.65 |  |  |
| *Persea americana* |  | 13.60 |  |  | 7.94 |  |  | 27.54 |  |
| *Phyllanthus emblica* |  |  |  |  |  |  | 3.54 |  |  |
| *Prunus cerasoides* | 3.12 |  | 6.27 | 4.93 |  |  |  |  | 4.60 |
| *Prunus domestica* |  |  |  |  |  |  |  | 3.42 |  |
| *Prunus persica* |  | 1.93 |  |  | 4.54 |  |  | 3.61 |  |
| *Psidium guajava* |  | 17.12 | 8.00 |  | 6.49 |  |  |  |  |
| *Punica granatum* |  |  |  |  | 2.83 |  |  |  |  |
| *Pyrus communis* |  |  |  |  | 23.83 |  |  | 17.87 |  |
| *Quercus semecarpifolia* |  |  |  |  |  | 2.76 |  |  |  |
| *Salix babylonica* |  |  |  |  |  |  |  | 5.91 | 4.12 |
| *Saurauria napaulensis* |  |  |  |  |  |  |  | 9.50 | 18.70 |
| *Schima wallichii* | 99.88 | 56.61 | 18.44 | 87.59 | 29.11 | 20.55 | 41.59 | 5.75 |  |
| *Solanum betaceum* |  | 2.59 |  |  | 5.67 |  |  | 15.13 |  |
| *Syzygium formosum* |  |  | 9.87 |  |  |  |  |  |  |
| *Tectona grandis* | 5.33 |  |  |  |  |  |  |  |  |
| *Trema politoria* | 7.39 | 8.20 |  |  |  |  |  |  |  |
| *Zizyphus mauritiana* |  |  | 3.93 |  |  |  |  |  |  |
| Total | 300 (%) | 300 (%) | 300 (%) | 300 (%) | 300 (%) | 300 (%) | 300 (%) | 300 (%) | 300 (%) |

**Supplementary material 4** Mean comparison of factors influencing the growth of Black Cardamom

| **Variables** | **Altitude** | **TT** | **MT** | **FT** | **Total** |
| --- | --- | --- | --- | --- | --- |
| **Tree height (m)** | **Low** | 19.60 ±4.52 | 12.78±5.55 | 12.03±3.05 | 44.41±13.12 |
|  | **Mid** | 11.89±4.05 | 19.07±6.60 | 11.51±2.89 | 42.47±13.54 |
|  | **High** | 14.81±4.96 | 9.98±2.41 | 9.71±2.28 | 34.49±9.65 |
|  | **Total** | 4631±13.53 | 41.83±14.55 | 33.24±8.22 |  |
| **Basal area/plot** | **Low** | 18.20±9.05 | 16.76±8.08 | 9.03±6.95 | 43.99±24.08 |
|  | **Mid** | 12.93±6.00 | 20.46±6.46 | 7.41±5.24 | 40.80±17.71 |
|  | **High** | 14.03±5.72 | 9.71±4.39 | 7.80±3.92 | 31.54±14.03 |
|  | **Total** | 45.16±20.76 | 46.93±18.93 | 24.23±16.12 |  |
| **Canopy cover (%)** | **Low** | 67.13±9.16 | 63.63±9.89 | 60.75±14.23 | 191.50±33.28 |
|  | **Mid** | 41.40±18.82 | 51.12±17.50 | 45.31±20.29 | 137.83±56.61 |
|  | **High** | 36.00±14.40 | 27.19±13.30 | 23.94±12.91 | 87.13±40.61 |
|  | **Total** | 144.53±42.37 | 141.93±40.69 | 130.00±47.43 |  |
| **Infested stem (Denity/plot)** | **Low** | 29±15 | 24±14 | 25±11 | 78±40 |
|  | **Mid** | 16±9 | 31±15 | 23±8 | 70±32 |
|  | **High** | 24±13 | 22±9 | 18±11 | 64±33 |
|  | **Total** | 69±37 | 77±38 | 66±30 |  |
